# Supplementary material for: Expansion of IL-23 receptor bearing TNFR2+ T cells is associated with molecular resistance to anti-TNF therapy in Crohn’s disease
Source: PubMed Central journal article supplement — Gut. 2018 May 30;68(5):814–28. doi: 10.1136/gutjnl-2017-315671 (PMC6580782; doi:10.1136/gutjnl-2017-315671), 2018-05-30
Supplement: gutjnl-2017-315671supp004.pdf [file gutjnl-2017-315671supp004.pdf]

## Supplementary table 1

**Abbreviations:** 5-aminosalicylates (5-ASA), budesonide (BUD), corticosteroids (GCS), methotrexate (MTX), 6-mercaptopurine (6-MP), azathioprine (AZA), antibody (Ab.), anti-TNF responder (R), anti-TNF non-responder (NR)

**Figure 1 patient information**

| ID | Age | Gender | Disease | Montreal classification | Age at diagnosis | Disease duration [years] | Concomitant medical treatment |     |     |     |      |     | Anti-TNF Ab. | Prior anti-TNF [SES-CD] | During anti-TNF [SES-CD] | Anti-TNF      | Non-response |
|----|-----|--------|---------|-------------------------|------------------|--------------------------|-------------------------------|-----|-----|-----|------|-----|--------------|-------------------------|--------------------------|---------------|--------------|
|    |     |        |         |                         |                  |                          | 5-ASA                         | BUD | GCS | MTX | 6-MP | AZA |              |                         |                          |               |              |
| 1  | 61  | f      | CD      | A2L3+L4B2               | 26               | 35                       |                               |     | X   |     |      |     | Adalimumab   | 6                       | 4                        | responder     | -            |
| 2  | 27  | f      | CD      | A2L3B1                  | 25               | 3                        |                               |     |     |     |      |     | Adalimumab   | 15                      | 2                        | responder     | -            |
| 3  | 41  | f      | CD      | A2L2+L4B1               | 35               | 7                        |                               |     | X   |     |      | X   | Adalimumab   | 11                      | 4                        | responder     | -            |
| 4  | 31  | f      | CD      | A2L2B1                  | 22               | 10                       |                               |     |     |     |      | X   | Adalimumab   | 10                      | 2                        | responder     | -            |
| 5  | 26  | m      | CD      | A1L3B1                  | 15               | 11                       | X                             |     | x   |     |      |     | Adalimumab   | 8                       | 0                        | responder     | -            |
| 6  | 52  | f      | CD      | A3L2B1p                 | 51               | 2                        |                               |     | X   |     |      | X   | Adalimumab   | 17                      | 2                        | responder     | -            |
| 7  | 62  | m      | CD      | A3L1B2                  | 44               | 19                       |                               |     |     |     |      |     | Adalimumab   | 13                      | 4                        | responder     | -            |
| 8  | 76  | m      | CD      | A3L3B2p                 | 52               | 24                       |                               |     |     |     |      | X   | Adalimumab   | 8                       | 0                        | responder     | -            |
| 9  | 54  | f      | CD      | A3L3B1                  | 44               | 11                       |                               |     |     | X   |      | X   | Adalimumab   | 6                       | 7                        | non-responder | secondary    |
| 10 | 33  | f      | CD      | A1L3+L4B1               | 15               | 19                       |                               |     |     |     |      |     | Adalimumab   | 8                       | 6                        | non-responder | primary      |
| 11 | 25  | m      | CD      | A1L1+L4B1               | 16               | 9                        |                               |     |     |     |      | X   | Adalimumab   | 5                       | 10                       | non-responder | primary      |
| 12 | 41  | f      | CD      | A2L3B2p                 | 29               | 13                       |                               |     | X   |     |      |     | Adalimumab   | 16                      | 6                        | non-responder | primary      |
| 13 | 52  | m      | CD      | A3L3+L4B2p              | 46               | 7                        |                               |     |     |     |      |     | Adalimumab   | 8                       | 21                       | non-responder | secondary    |
| 14 | 50  | m      | CD      | A3L3B2                  | 49               | 1                        |                               |     |     |     |      | X   | Adalimumab   | 6                       | 5                        | non-responder | secondary    |
| 15 | 46  | m      | CD      | A2L3B1                  | 37               | 9                        |                               | X   |     |     | X    |     | Adalimumab   | 12                      | 20                       | non-responder | secondary    |
| 16 | 22  | m      | CD      | A2L3B2p                 | 19               | 3                        |                               |     | X   |     |      |     | Adalimumab   | 8                       | 11                       | non-responder | secondary    |
| 17 | 43  | m      | CD      | A2L3B2p                 | 30               | 13                       |                               | X   |     |     |      | X   | Adalimumab   | 7                       | 9                        | non-responder | primary      |
| 18 | 27  | m      | CD      | A1L1B2                  | 16               | 11                       |                               |     |     |     |      |     | Adalimumab   | 8                       | 7                        | non-responder | primary      |
| 19 | 47  | m      | CD      | A2L2B2p                 | 26               | 21                       | X                             |     |     |     |      |     | Adalimumab   | 10                      | 13                       | non-responder | primary      |

**Figure 2 patient information**

| ID | Age | Gender | Disease | Montreal classification | Age at diagnosis | Disease duration [years] | Concomitant medical treatment |     |     |     |      |     | Anti-TNF Ab. | Anti-TNF treatment [months] | During anti-TNF [SES-CD] | Anti-TNF      | Non-response |
|----|-----|--------|---------|-------------------------|------------------|--------------------------|-------------------------------|-----|-----|-----|------|-----|--------------|-----------------------------|--------------------------|---------------|--------------|
|    |     |        |         |                         |                  |                          | 5-ASA                         | BUD | GCS | MTX | 6-MP | AZA |              |                             |                          |               |              |
| 20 | 43  | f      | CD      | A2L2B1p                 | 39               | 4                        |                               |     |     |     |      |     | Adalimumab   | 24                          | 3                        | responder     | -            |
| 21 | 24  | m      | CD      | A1L2B1                  | 13               | 11                       | X                             | X   |     |     |      |     | Infliximab   | 10                          | 4                        | responder     | -            |
| 22 | 28  | f      | CD      | A2L3B1p                 | 25               | 3                        |                               |     |     |     |      |     | Infliximab   | 12                          | 3                        | responder     | -            |
| 23 | 46  | f      | CD      | A2L3+L4B3               | 27               | 20                       |                               |     |     |     |      |     | Adalimumab   | 16                          | 9                        | non-responder | primary      |
| 15 | 47  | m      | CD      | A2L3B1                  | 37               | 10                       |                               |     |     |     | X    |     | Infliximab   | 14                          | 17                       | non-responder | primary      |
| 24 | 19  | m      | CD      | A1L3B2                  | 13               | 7                        |                               |     |     |     | X    |     | Adalimumab   | 20                          | 26                       | non-responder | primary      |

**Figure 2 statistics**

| Analysis                                 | R             | NR            | p-value (R vs. NR) |
|------------------------------------------|---------------|---------------|--------------------|
| Age [years]                              | 31.67 ± 10.02 | 37.33 ± 15.89 | 0.62               |
| Gender (f/m) [%]                         | 66.66 / 33.33 | 33.33 / 66.66 | -                  |
| Age at diagnosis                         | 25.67 ± 13.01 | 25.67 ± 12.06 | 0.99               |
| Disease Duration [years]                 | 6.00 ± 4.35   | 12.33 ± 6.08  | 0.24               |
| 5-ASA [%]                                | 33.33         | 0.00          | -                  |
| BUD [%]                                  | 33.33         | 66.66         | -                  |
| GCS [%]                                  | 0.00          | 0.00          | -                  |
| MTX [%]                                  | 0.00          | 0.00          | -                  |
| 6-MP [%]                                 | 0.00          | 0.00          | -                  |
| AZA [%]                                  | 0.00          | 66.66         | -                  |
| Anti-TNF Ab. (Infliximab/Adalimumab) [%] | 66.66 / 33.33 | 33.33 / 66.66 | -                  |
| Duration anti-TNF treatment [month]      | 15.33 ± 7.57  | 16.67 ± 3.05  | 0.79               |
| During anti-TNF therapy [SES-CD]         | 3.33 ± 0.57   | 17.33 ± 8.50  | 0.04               |
| Non-response (primary / secondary) [%]   | -             | 100.00 / 0.00 | -                  |

**Figure 3 patient information**

| ID  | Age | Gender | Disease | Montreal classification | Age at diagnosis | Disease duration [years] | Concomitant medical treatment |     |     |     |      |            | Anti-TNF Ab. | Anti-TNF treatment [months] | Prior anti-TNF [SES-CD] | During anti-TNF [SES-CD] | Anti-TNF  | Non-response |
|-----|-----|--------|---------|-------------------------|------------------|--------------------------|-------------------------------|-----|-----|-----|------|------------|--------------|-----------------------------|-------------------------|--------------------------|-----------|--------------|
|     |     |        |         |                         |                  |                          | 5-ASA                         | BUD | GCS | MTX | 6-MP | AZA        |              |                             |                         |                          |           |              |
| 25  | 18  | m      | CD      | A1L3L1                  | 16               | 2                        |                               |     |     |     |      | Infliximab | 5            | 8                           | 2                       | responder                | -         |              |
| 22  | 28  | f      | CD      | A2L1B2                  | 25               | 5                        |                               |     |     |     |      | Infliximab | 12           | 3                           | 0                       | responder                | -         |              |
| 26  | 29  | m      | CD      | A2L3B2                  | 24               | 5                        |                               |     |     |     |      | Infliximab | 3            | 7                           | 2                       | responder                | -         |              |
| 14  | 51  | m      | CD      | A3L3B2                  | 49               | 2                        |                               |     |     |     |      | Adalimumab | 8            | 6                           | 0                       | responder                | -         |              |
| 1   | 62  | f      | CD      | A2L3+L4B2               | 26               | 36                       |                               |     | X   |     |      | Adalimumab | 12           | 6                           | 4                       | responder                | -         |              |
| 7   | 63  | m      | CD      | A3L1B2                  | 44               | 20                       |                               |     |     |     |      | Adalimumab | 7            | 7                           | 4                       | responder                | -         |              |
| 27  | 58  | m      | CD      | A3L3+L4B1               | 42               | 17                       |                               |     | X   |     |      | Adalimumab | 16           | 7                           | 4                       | responder                | -         |              |
| 21  | 24  | m      | CD      | A1L2B1                  | 13               | 11                       | X                             | X   |     |     |      | Infliximab | 10           | 29                          | 4                       | responder                | -         |              |
| 11  | 26  | m      | CD      | A1L1+L4B1               | 16               | 12                       |                               |     |     |     |      | Adalimumab | 15           | 1                           | 0                       | responder                | -         |              |
| 28  | 22  | m      | CD      | A1L3B1                  | 16               | 6                        |                               |     |     |     |      | Adalimumab | 11           | 20                          | 0                       | responder                | -         |              |
| 6   | 54  | f      | CD      | A3L2B3p                 | 51               | 3                        |                               |     |     |     |      | Adalimumab | 14           | 17                          | 2                       | responder                | -         |              |
| 198 | 33  | f      | CD      | A2L2LB1                 | 27               | 6                        |                               |     |     |     |      | Adalimumab | 9            | 5                           | 3                       | responder                | -         |              |
| 5   | 27  | m      | CD      | A1L3B1                  | 15               | 13                       |                               |     |     |     |      | Adalimumab | 3            | 8                           | 0                       | responder                | -         |              |
| 29  | 34  | m      | CD      | A2L1+L4B1               | 32               | 3                        |                               |     |     |     |      | Infliximab | 3            | 6                           | 1                       | responder                | -         |              |
| 3   | 43  | f      | CD      | A2L2+L4B1               | 35               | 9                        |                               |     | X   |     | X    | Adalimumab | 22           | 11                          | 4                       | responder                | -         |              |
| 8   | 82  | m      | CD      | A3L3B2p                 | 52               | 30                       |                               |     |     |     | X    | Adalimumab | 25           | 8                           | 0                       | responder                | -         |              |
| 30  | 24  | m      | CD      | A1L3B2                  | 8                | 17                       |                               | X   |     |     |      | Infliximab | 8            | 31                          | 12                      | non-responder            | secondary |              |
| 31  | 37  | f      | CD      | A1L1B2                  | 16               | 21                       |                               |     |     |     |      | Infliximab | 5            | 5                           | 6                       | non-responder            | secondary |              |
| 24  | 19  | m      | CD      | A1L3B2                  | 13               | 7                        |                               |     |     |     | X    | Adalimumab | 20           | 24                          | 26                      | non-responder            | primary   |              |
| 17  | 44  | m      | CD      | A2L3B3                  | 30               | 14                       |                               | X   |     |     |      | Adalimumab | 6            | 7                           | 6                       | non-responder            | primary   |              |
| 23  | 46  | f      | CD      | A2L3+L4B3               | 27               | 20                       |                               |     |     |     |      | Adalimumab | 16           | 9                           | 9                       | non-responder            | primary   |              |
| 15  | 47  | m      | CD      | A2L3B1                  | 37               | 10                       |                               |     |     |     | X    | Adalimumab | 14           | 14                          | 17                      | non-responder            | primary   |              |
| 18  | 28  | m      | CD      | A1L3B2                  | 16               | 12                       |                               |     |     |     |      | Adalimumab | 11           | 8                           | 7                       | non-responder            | primary   |              |
| 32  | 38  | f      | CD      | A2L2+L4B1               | 28               | 11                       |                               |     |     |     |      | Infliximab | 4            | 25                          | 9                       | non-responder            | primary   |              |
| 19  | 49  | m      | CD      | A2L2B3p                 | 26               | 23                       |                               |     |     |     |      | Infliximab | 4            | 9                           | 5                       | non-responder            | primary   |              |
| 13  | 56  | m      | CD      | A3L3+L4B2p              | 46               | 11                       |                               |     |     |     |      | Adalimumab | 23           | 8                           | 21                      | non-responder            | secondary |              |
| 16  | 26  | m      | CD      | A2L3B2p                 | 19               | 8                        |                               |     | X   |     |      | Adalimumab | 14           | 8                           | 20                      | non-responder            | primary   |              |

**Figure 3 statistics**

| Analysis                                 | R             | NR            | p-value (R vs. NR) |
|------------------------------------------|---------------|---------------|--------------------|
| Age [years]                              | 40.88 ± 18.61 | 37.64 ± 11.94 | 0.61               |
| Gender (f/m) [%]                         | 31.25 / 68.75 | 27.27 / 72.72 | -                  |
| Age at diagnosis                         | 22.85 ± 37.82 | 24.18 ± 11.17 | 0.24               |
| Disease Duration [years]                 | 11.25 ± 10.08 | 14.00 ± 5.45  | 0.41               |
| 5-ASA [%]                                | 6.25          | 0.00          | -                  |
| BUD [%]                                  | 6.25          | 18.18         | -                  |
| GCS [%]                                  | 18.75         | 9.09          | -                  |
| MTX [%]                                  | 0.00          | 0.00          | -                  |
| 6-MP [%]                                 | 0.00          | 0.00          | -                  |
| AZA [%]                                  | 12.5          | 18.18         | -                  |
| Anti-TNF Ab. (Infliximab/Adalimumab) [%] | 68.75 / 31.25 | 36.36 / 63.63 | -                  |
| Duration anti-TNF treatment [month]      | 10.69 ± 6.80  | 11.36 ± 6.59  | 0.79               |
| Prior anti-TNF therapy [SES-CD]          | 9.31 ± 7.05   | 13.45 ± 8.90  | 0.19               |
| During anti-TNF therapy [SES-CD]         | 1.85 ± 1.74   | 12.55 ± 7.25  | < 0.0001           |
| Non-response (primary / secondary) [%]   | -             | 72.72 / 27.27 | -                  |

**Figure 4 patient information**

| ID        | Age | Gender | Disease | Age at diagnosis | Disease duration [years] | Anti-TNF Ab. | Anti-TNF treatment [months] |
|-----------|-----|--------|---------|------------------|--------------------------|--------------|-----------------------------|
| 33        | 23  | m      | CD      | 17               | 7                        | Adalimumab   | 14                          |
| 34        | 36  | f      | CD      | 32               | 5                        | Adalimumab   | 34                          |
| 9         | 59  | f      | CD      | 44               | 16                       | Adalimumab   | 59                          |
| 35        | 23  | m      | CD      | 22               | 2                        | Infliximab   | 14                          |
| 30        | 29  | m      | CD      | 8                | 22                       | Adalimumab   | 26                          |
| 36        | 50  | f      | CD      | 49               | 2                        | Adalimumab   | 6                           |
| 37        | 48  | f      | CD      | 48               | 1                        | Infliximab   | 3                           |
| 38        | 25  | f      | CD      | 19               | 7                        | Adalimumab   | 10                          |
| 39        | 46  | f      | CD      | 30               | 17                       | Adalimumab   | 33                          |
| 40        | 29  | m      | CD      | 21               | 9                        | Infliximab   | 81                          |
| 41        | 24  | f      | CD      | 15               | 9                        | Infliximab   | 7                           |
| 42        | 39  | f      | CD      | 20               | 20                       | Infliximab   | 16                          |
| 43        | 33  | f      | CD      | 26               | 7                        | Infliximab   | 7                           |
| 44        | 58  | f      | CD      | 56               | 2                        | Adalimumab   | 6                           |
| 45        | 28  | m      | CD      | 22               | 6                        | Infliximab   | 5                           |
| 46        | 40  | f      | CD      | 23               | 17                       | Adalimumab   | 4                           |
| 47        | 54  | m      | CD      | 17               | 37                       | Adalimumab   | 18                          |
| 48        | 47  | m      | CD      | 23               | 24                       | Infliximab   | 62                          |
| 49        | 45  | m      | CD      | 24               | 22                       | Adalimumab   | 52                          |
| 50        | 33  | f      | CD      | 30               | 3                        | Infliximab   | 15                          |
| 51        | 38  | m      | CD      | 21               | 17                       | Infliximab   | 53                          |
| 52        | 52  | f      | CD      | 44               | 8                        | Adalimumab   | 6                           |
| 53        | 25  | f      | CD      | 17               | 9                        | Adalimumab   | 15                          |
| 16        | 27  | m      | CD      | 19               | 9                        | Infliximab   | 11                          |
| 13        | 59  | m      | CD      | 46               | 13                       | Adalimumab   | 72                          |
| 54        | 42  | m      | CD      | 41               | 1                        | Infliximab   | 5                           |
| 55        | 42  | m      | CD      | 23               | 20                       | Adalimumab   | 9                           |
| 56        | 26  | f      | CD      | 23               | 4                        | Adalimumab   | 8                           |
| 57        | 44  | m      | CD      | 27               | 17                       | Adalimumab   | 13                          |
| 6         | 54  | f      | CD      | 51               | 3                        | Adalimumab   | 14                          |
| 58        | 46  | f      | CD      | 21               | 25                       | Adalimumab   | 14                          |
| 59        | 53  | f      | CD      | 21               | 33                       | Adalimumab   | 28                          |
| 60        | 25  | f      | CD      | 22               | 4                        | Infliximab   | 6                           |
| 61        | 57  | f      | CD      | 45               | 12                       | Infliximab   | 18                          |
| 62        | 21  | m      | CD      | 13               | 9                        | Adalimumab   | 36                          |
| Control 1 | 39  | f      | Control | -                | -                        | -            | -                           |
| Control 2 | 50  | m      | Control | -                | -                        | -            | -                           |
| Control 3 | 52  | m      | Control | -                | -                        | -            | -                           |
| Control 4 | 52  | m      | Control | -                | -                        | -            | -                           |
| Control 5 | 73  | f      | Control | -                | -                        | -            | -                           |
| Control 6 | 59  | m      | Control | -                | -                        | -            | -                           |
| Control 7 | 70  | m      | Control | -                | -                        | -            | -                           |

**Figure 5a patient information**

| ID | Age | Gender | Disease | Montreal classification | Age at diagnosis | Disease duration [years] | Concomitant medical treatment |     |     |     |      |     | Anti-TNF Ab. | Anti-TNF treatment [months] | During anti-TNF [SES-CD] | Anti-TNF      | Non-response |
|----|-----|--------|---------|-------------------------|------------------|--------------------------|-------------------------------|-----|-----|-----|------|-----|--------------|-----------------------------|--------------------------|---------------|--------------|
|    |     |        |         |                         |                  |                          | 5-ASA                         | BUD | GCS | MTX | 6-MP | AZA |              |                             |                          |               |              |
| 63 | 40  | f      | CD      | A2L1B3p                 | 37               | 4                        |                               |     |     |     |      |     | Adalimumab   | 21                          | 1                        | responder     | -            |
| 64 | 49  | f      | CD      | A1L3B2                  | 16               | 34                       |                               | X   |     |     |      |     | Infliximab   | 13                          | 4                        | responder     | -            |
| 65 | 21  | m      | CD      | A2L1B2p                 | 18               | 4                        |                               | X   |     |     |      |     | Infliximab   | 23                          | 1                        | responder     | -            |
| 66 | 27  | f      | CD      | A2L1B2                  | 19               | 9                        |                               |     |     |     |      |     | Infliximab   | 6                           | 4                        | responder     | -            |
| 67 | 23  | m      | CD      | A2L3B3p                 | 20               | 3                        |                               |     |     |     | X    |     | Infliximab   | 14                          | 3                        | responder     | -            |
| 35 | 23  | m      | CD      | A2L1B1                  | 22               | 2                        | x                             |     |     |     |      |     | Infliximab   | 14                          | 1                        | responder     | -            |
| 9  | 59  | f      | CD      | A3L3B1                  | 44               | 16                       |                               |     |     |     |      |     | Adalimumab   | 59                          | 4                        | responder     | -            |
| 56 | 26  | f      | CD      | A2L1+L4B3               | 25               | 2                        |                               |     |     |     |      |     | Infliximab   | 32                          | 2                        | responder     | -            |
| 68 | 33  | f      | CD      | A2L3B1                  | 21               | 13                       | X                             |     |     |     |      |     | Adalimumab   | 9                           | 17                       | non-responder | secondary    |
| 69 | 19  | m      | CD      | A1L1B2                  | 13               | 6                        |                               |     |     | X   |      |     | Infliximab   | 11                          | 9                        | non-responder | primary      |
| 57 | 44  | m      | CD      | A2L3B2                  | 27               | 17                       | X                             |     |     |     |      |     | Adalimumab   | 13                          | 11                       | non-responder | primary      |
| 70 | 37  | f      | CD      | A1L2B2p                 | 16               | 22                       |                               | X   |     |     |      |     | Adalimumab   | 14                          | 21                       | non-responder | secondary    |
| 71 | 49  | f      | CD      | A2L2B2p                 | 39               | 10                       |                               |     |     |     |      |     | Adalimumab   | 8                           | 6                        | non-responder | primary      |
| 72 | 37  | m      | CD      | A1L1+L4B3p              | 15               | 22                       |                               |     |     | X   |      |     | Adalimumab   | 20                          | 8                        | non-responder | secondary    |
| 73 | 28  | f      | CD      | A2L1B2                  | 17               | 11                       | X                             | X   |     |     |      |     | Infliximab   | 14                          | 7                        | non-responder | primary      |
| 74 | 30  | m      | CD      | A1L2B2p                 | 16               | 15                       |                               |     |     |     |      |     | Adalimumab   | 39                          | 12                       | non-responder | secondary    |
| 75 | 22  | f      | CD      | A2L3+L4B2               | 17               | 6                        |                               | X   |     |     |      |     | Infliximab   | 14                          | 8                        | non-responder | secondary    |
| 76 | 37  | m      | CD      | A2L3B2                  | 23               | 14                       |                               |     |     |     |      |     | Infliximab   | 15                          | 7                        | non-responder | secondary    |
| 77 | 20  | m      | CD      | A2L1B3                  | 18               | 2                        |                               |     |     |     |      |     | Adalimumab   | 9                           | 11                       | non-responder | secondary    |
| 78 | 49  | f      | CD      | A2L3B2                  | 37               | 12                       | X                             |     |     |     |      |     | Adalimumab   | 15                          | 9                        | non-responder | secondary    |

**Figure 5a statistics**

| Analysis                                 | R             | NR            | p-value (R vs. NR) |
|------------------------------------------|---------------|---------------|--------------------|
| Age [years]                              | 33.50 ± 14.18 | 33.75 ± 10.42 | 0.96               |
| Gender (f/m) [%]                         | 62.50 / 37.50 | 50.00 / 50.00 | -                  |
| Age at diagnosis                         | 25.13 ± 3.54  | 21.58 ± 8.56  | 0.40               |
| Disease Duration [years]                 | 9.25 ± 11.07  | 12.50 ± 6.12  | 0.40               |
| 5-ASA [%]                                | 12.50         | 33.33         | -                  |
| BUD [%]                                  | 25.00         | 25.00         | -                  |
| GCS [%]                                  | 0.00          | 0.00          | -                  |
| MTX [%]                                  | 0.00          | 16.66         | -                  |
| 6-MP [%]                                 | 0.00          | 0.00          | -                  |
| AZA [%]                                  | 12.50         | 0.00          | -                  |
| Anti-TNF Ab. (Infliximab/Adalimumab) [%] | 75.00 / 25.00 | 33.33 / 66.66 | -                  |
| Duration anti-TNF treatment [month]      | 22.75 ± 16.61 | 15.08 ± 8.22  | 0.18               |
| During anti-TNF therapy [SES-CD]         | 2.50 ± 1.41   | 10.50 ± 4.42  | 0.0001             |
| Non-response (primary / secondary) [%]   | -             | 33.33 / 66.66 | -                  |

**Figure 5b patient information**

| ID  | Age | Gender | Disease | Montreal classification | Age at diagnosis | Disease duration [years] | Concomitant medical treatment |     |     |     |      |     | Anti-TNF Ab. | Anti-TNF treatment [months] | Prior anti-TNF [SES-CD] | During anti-TNF [SES-CD] | Anti-TNF      | Non-response |
|-----|-----|--------|---------|-------------------------|------------------|--------------------------|-------------------------------|-----|-----|-----|------|-----|--------------|-----------------------------|-------------------------|--------------------------|---------------|--------------|
|     |     |        |         |                         |                  |                          | 5-ASA                         | BUD | GCS | MTX | 6-MP | AZA |              |                             |                         |                          |               |              |
| 71  | 48  | f      | CD      | A2L2B2p                 | 39               | 9                        |                               |     | X   |     |      |     | none         | -                           | 14                      | -                        | naive         | -            |
| 79  | 37  | m      | CD      | A2L1B3                  | 36               | 1                        |                               |     |     |     |      |     | none         | -                           | 5                       | -                        | naive         | -            |
| 80  | 52  | m      | CD      | A1L3B1                  | 16               | 36                       |                               | X   |     |     |      |     | none         | -                           | 7                       | -                        | naive         | -            |
| 81  | 30  | m      | CD      | A2L2+L4B1               | 27               | 4                        | X                             | X   |     |     |      |     | none         | -                           | 4                       | -                        | naive         | -            |
| 82  | 25  | m      | CD      | A1L1+L4B2               | 11               | 14                       |                               |     |     |     | X    |     | none         | -                           | 2                       | -                        | naive         | -            |
| 83  | 29  | m      | CD      | A2L3B2                  | 29               | 1                        |                               |     | X   |     |      |     | none         | -                           | 15                      | -                        | naive         | -            |
| 199 | 54  | m      | CD      | A3L3+L4B2               | 42               | 13                       |                               |     | X   |     |      |     | none         | -                           | 9                       | -                        | naive         | -            |
| 19  | 52  | m      | CD      | A2L2B3p                 | 26               | 26                       | X                             |     |     |     |      |     | none         | -                           | 8                       | -                        | naive         | -            |
| 84  | 30  | f      | CD      | A2L3B2                  | 23               | 7                        |                               |     |     |     | X    |     | none         | -                           | 7                       | -                        | naive         | -            |
| 85  | 48  | f      | CD      | A2L3B2                  | 18               | 30                       |                               |     |     |     |      |     | none         | -                           | 6                       | -                        | naive         | -            |
| 86  | 36  | m      | CD      | A2L2B1                  | 28               | 8                        | X                             |     |     |     |      |     | none         | -                           | 14                      | -                        | naive         | -            |
| 87  | 21  | f      | CD      | A2L2B1                  | 18               | 3                        |                               |     |     |     |      |     | none         | -                           | 14                      | -                        | naive         | -            |
| 88  | 50  | m      | CD      | A1L3B2p                 | 15               | 36                       | X                             |     |     |     |      |     | none         | -                           | 6                       | -                        | naive         | -            |
| 89  | 28  | f      | CD      | A2L2B1                  | 21               | 8                        |                               |     |     |     | X    |     | none         | -                           | 15                      | -                        | naive         | -            |
| 90  | 37  | m      | CD      | A2L3B2p                 | 22               | 15                       |                               |     |     |     |      |     | Adalimumab   | 72                          | -                       | 4                        | responder     | -            |
| 91  | 36  | m      | CD      | A2L3+L4B2p              | 17               | 20                       |                               |     |     |     |      |     | Adalimumab   | 6                           | -                       | 3                        | responder     | -            |
| 34  | 36  | f      | CD      | A2L3B1                  | 32               | 5                        |                               | X   |     |     |      |     | Adalimumab   | 34                          | -                       | 0                        | responder     | -            |
| 9   | 59  | f      | CD      | A3L3B1                  | 44               | 16                       |                               |     |     |     |      |     | Adalimumab   | 59                          | -                       | 4                        | responder     | -            |
| 37  | 48  | f      | CD      | A3L2B1                  | 48               | 1                        |                               |     | X   |     |      |     | Infliximab   | 3                           | -                       | 0                        | responder     | -            |
| 35  | 23  | m      | CD      | A2L1B1                  | 22               | 2                        | X                             |     |     |     |      |     | Infliximab   | 14                          | -                       | 1                        | responder     | -            |
| 39  | 46  | f      | CD      | A2L1B3p                 | 30               | 17                       |                               |     |     |     |      |     | Adalimumab   | 33                          | -                       | 0                        | responder     | -            |
| 49  | 44  | m      | CD      | A2L3B2p                 | 24               | 21                       |                               |     |     |     |      |     | Adalimumab   | 40                          | -                       | 4                        | responder     | -            |
| 34  | 37  | f      | CD      | A2L3B1                  | 32               | 5                        |                               | X   |     |     |      |     | Adalimumab   | 42                          | -                       | 2                        | responder     | -            |
| 53  | 25  | f      | CD      | A2L3B2p                 | 17               | 9                        |                               |     |     |     |      |     | Adalimumab   | 15                          | -                       | 2                        | responder     | -            |
| 92  | 37  | m      | CD      | A2L1B2                  | 27               | 10                       | X                             |     |     |     |      |     | Adalimumab   | 41                          | -                       | 0                        | responder     | -            |
| 58  | 47  | f      | CD      | A2L2B3                  | 21               | 27                       |                               |     |     |     |      |     | Adalimumab   | 16                          | -                       | 4                        | responder     | -            |
| 56  | 26  | f      | CD      | A2L1+L4B3               | 25               | 2                        |                               |     |     |     |      |     | Infliximab   | 32                          | -                       | 2                        | responder     | -            |
| 93  | 22  | m      | CD      | A1L3B3p                 | 3                | 20                       |                               |     |     |     |      |     | Adalimumab   | 60                          | -                       | 12                       | non-responder | secondary    |
| 33  | 23  | m      | CD      | A2L3B3p                 | 17               | 7                        |                               | X   |     |     |      |     | Adalimumab   | 14                          | -                       | 6                        | non-responder | secondary    |
| 62  | 21  | m      | CD      | A1L3B1                  | 13               | 9                        |                               |     |     |     |      |     | Adalimumab   | 36                          | -                       | 7                        | non-responder | secondary    |
| 30  | 29  | m      | CD      | A1L3B2                  | 8                | 22                       | X                             |     | X   |     | X    |     | Adalimumab   | 26                          | -                       | 17                       | non-responder | primary      |
| 36  | 50  | f      | CD      | A3L2B2p                 | 49               | 2                        |                               |     | X   |     |      |     | Adalimumab   | 6                           | -                       | 16                       | non-responder | primary      |
| 38  | 25  | f      | CD      | A2L3+L4B3               | 19               | 7                        | X                             |     |     |     |      |     | Adalimumab   | 10                          | -                       | 14                       | non-responder | secondary    |
| 94  | 20  | f      | CD      | A1L3+L4B2p              | 10               | 10                       | X                             |     |     |     |      |     | Infliximab   | 15                          | -                       | 5                        | non-responder | secondary    |
| 95  | 19  | m      | CD      | A2L1+L4B1               | 17               | 2                        |                               |     | X   |     |      |     | Adalimumab   | 6                           | -                       | 17                       | non-responder | secondary    |
| 52  | 52  | f      | CD      | A3L3+L4B2               | 44               | 8                        |                               |     |     |     |      |     | Adalimumab   | 6                           | -                       | 11                       | non-responder | primary      |
| 96  | 47  | f      | CD      | A2L3+L4B1               | 32               | 16                       |                               |     |     |     |      |     | Infliximab   | 56                          | -                       | 6                        | non-responder | primary      |
| 97  | 30  | m      | CD      | A2L1B2p                 | 17               | 14                       |                               |     |     |     |      |     | Infliximab   | 16                          | -                       | 5                        | non-responder | primary      |
| 98  | 43  | f      | CD      | A2L3+L4B1               | 35               | 9                        |                               |     |     |     |      |     | Infliximab   | 56                          | -                       | 7                        | non-responder | primary      |
| 99  | 55  | m      | CD      | A3L2B2                  | 41               | 15                       |                               |     | X   |     |      |     | Infliximab   | 39                          | -                       | 5                        | non-responder | secondary    |
| 100 | 23  | f      | CD      | A2L1B3                  | 20               | 4                        |                               |     | X   |     |      |     | Adalimumab   | 27                          | -                       | 9                        | non-responder | secondary    |
| 74  | 30  | m      | CD      | A1L2B2                  | 16               | 15                       |                               |     |     |     |      |     | Adalimumab   | 39                          | -                       | 12                       | non-responder | secondary    |
| 101 | 35  | f      | CD      | A2L3+L4B3               | 29               | 7                        | X                             |     |     |     |      |     | Adalimumab   | 23                          | -                       | 8                        | non-responder | secondary    |

**Figure 5b statistics**

| Statistics                               | Anti-TNF naive | R              | NR            | p-value (R vs. NR / anti-TNF naive vs. NR) |
|------------------------------------------|----------------|----------------|---------------|--------------------------------------------|
| Age [years]                              | 38.57 ± 11.63  | 38.54 ± 11.028 | 32.75 ± 12.55 | 0.19 / 0.29                                |
| Gender (f/m) [%]                         | 35.71 / 64.28  | 61.53 / 38.46  | 50.00 / 50.00 | -                                          |
| Age at diagnosis                         | 24.93 ± 9.23   | 27.77 ± 9.48   | 23.13 ± 13.61 | 0.30 / 0.67                                |
| Disease Duration [years]                 | 14.00 ± 12.63  | 11.54 ± 8.41   | 10.44 ± 6.00  | 0.68 / 0.32                                |
| 5-ASA [%]                                | 35.71          | 15.38          | 25.00         | -                                          |
| BUD [%]                                  | 7.14           | 15.38          | 6.25          | -                                          |
| GCS [%]                                  | 21.42          | 7.69           | 31.25         | -                                          |
| MTX [%]                                  | 0.00           | 0.00           | 0.00          | -                                          |
| 6-MP [%]                                 | 0.00           | 0.00           | 0.00          | -                                          |
| AZA [%]                                  | 28.57          | 0.00           | 6.25          | -                                          |
| Anti-TNF Ab. (Infliximab/Adalimumab) [%] | -              | 23.07 / 76.92  | 31.25 / 68.75 | -                                          |
| Duration anti-TNF treatment [month]      | -              | 31.31 ± 20.33  | 27.19 ± 18.62 | 0.57 / -                                   |
| During anti-TNF therapy [SES-CD]         | -              | 2.00 ± 1.68    | 9.81 ± 4.38   | 0.0001 / -                                 |
| Non-response (primary / secondary) [%]   | -              | -              | 37.50 / 62.50 | -                                          |

**Figure 6 patient information**

| ID         | Age | Gender | Disease | Age at diagnosis | Disease duration [years] | Anti-TNF Ab. | Anti-TNF treatment [months] |
|------------|-----|--------|---------|------------------|--------------------------|--------------|-----------------------------|
| 16         | 27  | m      | CD      | 19               | 9                        | Infliximab   | 11                          |
| 13         | 59  | m      | CD      | 46               | 13                       | Adalimumab   | 72                          |
| 54         | 42  | m      | CD      | 41               | 1                        | Infliximab   | 5                           |
| 55         | 42  | m      | CD      | 23               | 20                       | Adalimumab   | 30                          |
| 102        | 37  | f      | CD      | 36               | 2                        | Adalimumab   | 28                          |
| 103        | 27  | m      | CD      | 25               | 2                        | Adalimumab   | 9                           |
| 104        | 52  | f      | CD      | 47               | 6                        | Adalimumab   | 31                          |
| 105        | 46  | m      | CD      | 6                | 41                       | Infliximab   | 34                          |
| 106        | 41  | m      | CD      | 22               | 19                       | Adalimumab   | 40                          |
| 107        | 68  | f      | CD      | 41               | 28                       | Infliximab   | 64                          |
| 108        | 56  | f      | CD      | 27               | 29                       | Adalimumab   | 33                          |
| 109        | 37  | m      | CD      | 20               | 18                       | Adalimumab   | 38                          |
| 110        | 60  | f      | CD      | 42               | 19                       | Adalimumab   | 3                           |
| 111        | 37  | f      | CD?     | 24               | 13                       | Infliximab   | 4                           |
| 112        | 22  | f      | CD      | 15               | 8                        | Adalimumab   | 51                          |
| 113        | 24  | f      | CD      | 21               | 4                        | Infliximab   | 17                          |
| 114        | 29  | f      | CD      | 17               | 13                       | Infliximab   | 39                          |
| 115        | 66  | f      | CD      | 46               | 21                       | Infliximab   | 27                          |
| 116        | 47  | f      | CD      | 21               | 26                       | Infliximab   | 42                          |
| 117        | 32  | m      | CD      | 11               | 21                       | Adalimumab   | 6                           |
| 118        | 36  | f      | CD      | 19               | 17                       | Infliximab   | 51                          |
| 119        | 23  | f      | CD      | 10               | 13                       | Adalimumab   | 17                          |
| 120        | 44  | f      | CD      | 21               | 23                       | infliximab   | 50                          |
| 121        | 39  | m      | CD      | 33               | 6                        | Infliximab   | 34                          |
| 71         | 41  | f      | CD      | 27               | 12                       | Infliximab   | 13                          |
| 122        | 32  | f      | CD      | 31               | 2                        | Infliximab   | 3                           |
| 123        | 40  | m      | CD      | 35               | 6                        | Infliximab   | 14                          |
| 96         | 47  | f      | CD      | 32               | 15                       | Infliximab   | 3                           |
| 32         | 42  | f      | CD      | 28               | 15                       | Infliximab   | 50                          |
| 124        | 32  | f      | CD      | 19               | 14                       | Infliximab   | 72                          |
| 125        | 23  | m      | CD      | 19               | 5                        | Infliximab   | 15                          |
| 45         | 29  | m      | CD      | 22               | 7                        | Infliximab   | 16                          |
| 126        | 38  | f      | CD      | 27               | 12                       | Infliximab   | 23                          |
| 12         | 47  | f      | CD      | 29               | 19                       | Infliximab   | 66                          |
| 127        | 65  | f      | CD      | 22               | 44                       | Infliximab   | 87                          |
| 20         | 49  | f      | CD      | 39               | 10                       | Adalimumab   | 31                          |
| 91         | 38  | m      | CD      | 17               | 22                       | Adalimumab   | 25                          |
| 128        | 58  | m      | CD      | 53               | 5                        | Adalimumab   | 22                          |
| 129        | 27  | m      | CD      | 25               | 2                        | Infliximab   | 3                           |
| 130        | 55  | f      | CD      | 46               | 10                       | Adalimumab   | 21                          |
| Control 8  | 30  | f      | Control | -                | -                        | -            | -                           |
| Control 9  | 43  | f      | Control | -                | -                        | -            | -                           |
| Control 10 | 54  | f      | Control | -                | -                        | -            | -                           |
| Control 11 | 31  | f      | Control | -                | -                        | -            | -                           |
| Control 12 | 45  | f      | Control | -                | -                        | -            | -                           |
| Control 13 | 43  | f      | Control | -                | -                        | -            | -                           |

**Figure 7ab patient information**

| ID         | Age | Gender | Disease | Age at diagnosis | Disease duration [years] | Anti-TNF Ab. | Anti-TNF treatment [months] |
|------------|-----|--------|---------|------------------|--------------------------|--------------|-----------------------------|
| 131        | 34  | m      | CD      | 29               | 5                        | Adalimumab   | 42                          |
| 132        | 57  | m      | CD      | 34               | 5                        | Adalimumab   | 31                          |
| 133        | 26  | f      | CD      | 25               | 2                        | Infliximab   | 7                           |
| 100        | 23  | f      | CD      | 20               | 4                        | Adalimumab   | 27                          |
| 52         | 50  | f      | CD      | 44               | 7                        | Infliximab   | 11                          |
| 134        | 23  | m      | CD      | 19               | 5                        | Infliximab   | 51                          |
| 135        | 45  | f      | CD      | 24               | 21                       | Adalimumab   | 3                           |
| 136        | 58  | m      | CD      | 38               | 22                       | Infliximab   | 13                          |
| 137        | 75  | f      | CD      | 67               | 8                        | Infliximab   | 5                           |
| 138        | 32  | m      | CD      | 8                | 25                       | Adalimumab   | 8                           |
| 139        | 49  | m      | CD      | 39               | 11                       | Infliximab   | 12                          |
| 90         | 37  | m      | CD      | 22               | 15                       | Adalimumab   | 72                          |
| 63         | 40  | f      | CD      | 37               | 4                        | Adalimumab   | 21                          |
| 108        | 54  | f      | CD      | 27               | 27                       | Adalimumab   | 7                           |
| 140        | 29  | m      | CD      | 14               | 16                       | Adalimumab   | 8                           |
| 141        | 32  | f      | CD      | 26               | 6                        | Infliximab   | 10                          |
| 142        | 48  | f      | CD      | 47               | 2                        | Infliximab   | 16                          |
| 143        | 50  | f      | CD      | 21               | 30                       | Infliximab   | 11                          |
| 144        | 23  | m      | CD      | 15               | 9                        | Adalimumab   | 24                          |
| 145        | 60  | f      | CD      | 27               | 34                       | Infliximab   | 18                          |
| 16         | 25  | m      | CD      | 19               | 7                        | Infliximab   | 35                          |
| 146        | 45  | f      | CD      | 18               | 27                       | Infliximab   | 5                           |
| 147        | 20  | f      | CD      | 18               | 2                        | Adalimumab   | 5                           |
| 148        | 30  | f      | CD      | 26               | 4                        | Infliximab   | 20                          |
| 149        | 52  | m      | CD      | 28               | 24                       | Infliximab   | 9                           |
| 150        | 21  | m      | CD      | 16               | 5                        | Infliximab   | 36                          |
| 151        | 29  | f      | CD      | 18               | 11                       | Infliximab   | 54                          |
| 152        | 22  | f      | CD      | 20               | 3                        | Infliximab   | 20                          |
| 153        | 31  | f      | CD      | 26               | 5                        | Infliximab   | 11                          |
| 32         | 41  | f      | CD      | 28               | 13                       | Infliximab   | 32                          |
| 154        | 39  | m      | CD      | 18               | 21                       | Infliximab   | 15                          |
| 155        | 25  | f      | CD      | 20               | 5                        | Infliximab   | 21                          |
| Control 14 | 34  | m      | Control | -                | -                        | -            | -                           |
| Control 15 | 64  | m      | Control | -                | -                        | -            | -                           |
| Control 16 | 56  | m      | Control | -                | -                        | -            | -                           |
| Control 17 | 66  | m      | Control | -                | -                        | -            | -                           |
| Control 18 | 89  | f      | Control | -                | -                        | -            | -                           |
| Control 19 | 58  | f      | Control | -                | -                        | -            | -                           |
| Control 20 | 18  | m      | Control | -                | -                        | -            | -                           |
| Control 21 | 47  | m      | Control | -                | -                        | -            | -                           |
| Control 22 | 83  | m      | Control | -                | -                        | -            | -                           |
| Control 23 | 86  | m      | Control | -                | -                        | -            | -                           |
| Control 9  | 41  | f      | Control | -                | -                        | -            | -                           |
| Control 10 | 51  | f      | Control | -                | -                        | -            | -                           |
| Control 24 | 35  | m      | Control | -                | -                        | -            | -                           |
| Control 25 | 49  | f      | Control | -                | -                        | -            | -                           |
| Control 11 | 29  | f      | Control | -                | -                        | -            | -                           |
| Control 26 | 40  | f      | Control | -                | -                        | -            | -                           |
| Control 27 | 31  | f      | Control | -                | -                        | -            | -                           |
| Control 28 | 52  | f      | Control | -                | -                        | -            | -                           |



**Figure 7c patient information**

| ID         | Age | Gender | Disease | Montreal classification | Age at diagnosis | Disease duration [years] | Concomitant medical treatment |     |     |     |      |     | Anti-TNF Ab. | Anti-TNF treatment [months] | Prior anti-TNF [SES-CD] | During anti-TNF [SES-CD] | Anti-TNF      | Non-response |
|------------|-----|--------|---------|-------------------------|------------------|--------------------------|-------------------------------|-----|-----|-----|------|-----|--------------|-----------------------------|-------------------------|--------------------------|---------------|--------------|
|            |     |        |         |                         |                  |                          | 5-ASA                         | BUD | GCS | MTX | 6-MP | AZA |              |                             |                         |                          |               |              |
| 87         | 21  | f      | CD      | A2L2B1                  | 18               | 3                        |                               |     |     |     |      |     | none         | -                           | 14                      | -                        | naive         | -            |
| 88         | 50  | m      | CD      | A1L3B2p                 | 15               | 36                       | X                             |     |     |     |      |     | none         | -                           | 6                       | -                        | naive         | -            |
| 89         | 28  | f      | CD      | A2L2B1                  | 21               | 8                        |                               |     |     |     |      | X   | none         | -                           | 15                      | -                        | naive         | -            |
| 156        | 53  | f      | CD      | A3L3B3p                 | 47               | 7                        |                               |     |     |     |      | X   | none         | -                           | 4                       | -                        | naive         | -            |
| 157        | 34  | f      | CD      | A2L1B3                  | 21               | 14                       |                               |     |     |     |      |     | none         | -                           | 9                       | -                        | naive         | -            |
| 158        | 38  | f      | CD      | A2L1+L4B2               | 21               | 18                       |                               |     | X   |     |      | X   | none         | -                           | 1                       | -                        | naive         | -            |
| 159        | 38  | f      | CD      | A2L3                    | 30               | 9                        |                               |     |     |     |      |     | Adalimumab   | 43                          | -                       | 3                        | responder     | -            |
| 160        | 36  | f      | CD      | A2LB1p                  | 27               | 10                       |                               |     |     |     |      |     | Infliximab   | 110                         | -                       | 0                        | responder     | -            |
| 29         | 37  | m      | CD      | A2L1+L4B1               | 32               | 5                        |                               |     |     |     |      |     | Infliximab   | 32                          | -                       | 1                        | responder     | -            |
| 161        | 62  | m      | CD      | A3L1B2                  | 61               | 1                        | X                             | X   |     |     |      |     | Infliximab   | 20                          | -                       | 4                        | responder     | -            |
| 120        | 42  | f      | CD      | A2L1B1                  | 21               | 21                       |                               |     |     |     |      |     | Infliximab   | 33                          | -                       | 0                        | responder     | -            |
| 162        | 40  | f      | CD      | A2L2B1                  | 28               | 12                       | X                             |     |     |     |      |     | Infliximab   | 44                          | -                       | 1                        | responder     | -            |
| 58         | 47  | f      | CD      | A2L2B2p                 | 21               | 27                       |                               |     |     |     |      |     | Adalimumab   | 16                          | -                       | 4                        | responder     | -            |
| 163        | 50  | m      | CD      | A2L2B1                  | 38               | 13                       |                               |     | X   |     |      |     | Infliximab   | 10                          | -                       | 3                        | responder     | -            |
| 68         | 33  | f      | CD      | A2L3B1                  | 21               | 13                       | X                             |     |     |     |      |     | Adalimumab   | 9                           | -                       | 17                       | non-responder | secondary    |
| 21         | 26  | m      | CD      | A1L2B1                  | 13               | 14                       |                               |     | X   |     |      |     | Infliximab   | 42                          | -                       | 5                        | non-responder | secondary    |
| 100        | 23  | f      | CD      | A2L1B3                  | 20               | 4                        |                               |     | X   |     |      |     | Adalimumab   | 27                          | -                       | 9                        | non-responder | secondary    |
| 52         | 52  | f      | CD      | A3L3+L4B2               | 44               | 8                        |                               |     |     |     |      |     | Adalimumab   | 6                           | -                       | 11                       | non-responder | primary      |
| 96         | 47  | f      | CD      | A2L3+L4B2               | 32               | 16                       |                               |     |     |     |      |     | Infliximab   | 56                          | -                       | 6                        | non-responder | primary      |
| 97         | 30  | m      | CD      | A2L1B2p                 | 17               | 14                       |                               |     |     |     |      |     | Infliximab   | 16                          | -                       | 5                        | non-responder | primary      |
| 98         | 43  | f      | CD      | A2L3+L4B1               | 35               | 9                        |                               |     |     |     |      |     | Infliximab   | 56                          | -                       | 7                        | non-responder | primary      |
| 99         | 55  | m      | CD      | A3L2B2                  | 41               | 15                       |                               |     | X   |     |      |     | Infliximab   | 39                          | -                       | 5                        | non-responder | secondary    |
| 164        | 21  | m      | CD      | A1L3+L4B1               | 13               | 9                        |                               |     |     |     |      |     | Infliximab   | 26                          | -                       | 12                       | non-responder | primary      |
| 147        | 23  | f      | CD      | A2L3+L4B2               | 18               | 5                        |                               |     |     |     |      |     | Infliximab   | 13                          | -                       | 12                       | non-responder | primary      |
| Control 29 | 40  | m      | Control | -                       | -                | -                        | -                             | -   | -   | -   | -    | -   | -            | -                           | -                       | -                        | control       | -            |
| Control 14 | 34  | m      | Control | -                       | -                | -                        | -                             | -   | -   | -   | -    | -   | -            | -                           | -                       | -                        | control       | -            |
| Control 17 | 66  | m      | Control | -                       | -                | -                        | -                             | -   | -   | -   | -    | -   | -            | -                           | -                       | -                        | control       | -            |
| Control 18 | 89  | f      | Control | -                       | -                | -                        | -                             | -   | -   | -   | -    | -   | -            | -                           | -                       | -                        | control       | -            |
| Control 19 | 58  | f      | Control | -                       | -                | -                        | -                             | -   | -   | -   | -    | -   | -            | -                           | -                       | -                        | control       | -            |
| Control 20 | 18  | m      | Control | -                       | -                | -                        | -                             | -   | -   | -   | -    | -   | -            | -                           | -                       | -                        | control       | -            |
| Control 21 | 47  | m      | Control | -                       | -                | -                        | -                             | -   | -   | -   | -    | -   | -            | -                           | -                       | -                        | control       | -            |
| Control 22 | 83  | m      | Control | -                       | -                | -                        | -                             | -   | -   | -   | -    | -   | -            | -                           | -                       | -                        | control       | -            |

**Figure 7c statistics**

| Statistics                               | Anti-TNF naive | R             | NR            | p-value (R vs. NR / anti-TNF naive vs. NR) |
|------------------------------------------|----------------|---------------|---------------|--------------------------------------------|
| Age [years]                              | 37.33 ± 12.42  | 44.00 ± 8.76  | 35.70 ± 12.85 | 0.12 / 0.76                                |
| Gender (f/m) [%]                         | 16.66 / 83.33  | 62.50 / 37.50 | 60.00 / 40.00 | -                                          |
| Age at diagnosis                         | 23.83 ± 11.60  | 32.25 ± 12.89 | 25.40 ± 11.58 | 0.25 / 0.79                                |
| Disease Duration [years]                 | 14.33 ± 11.88  | 12.25 ± 8.36  | 10.70 ± 4.20  | 0.60 / 0.38                                |
| 5-ASA [%]                                | 16.66          | 25.00         | 10.00         | -                                          |
| BUD [%]                                  | 0.00           | 12.50         | 0.00          | -                                          |
| GCS [%]                                  | 16.66          | 25.00         | 30.00         | -                                          |
| MTX [%]                                  | 0.00           | 0.00          | 0.00          | -                                          |
| 6-MP [%]                                 | 0.00           | 0.00          | 0.00          | -                                          |
| AZA [%]                                  | 50.00          | 0.00          | 0.00          | -                                          |
| Anti-TNF Ab. (Infliximab/Adalimumab) [%] | -              | 75.00 / 25.00 | 70.00 / 30.00 | -                                          |
| Duration anti-TNF treatment [month]      | -              | 38.50 ± 31.39 | 29.00 ± 18.40 | 0.43 / -                                   |
| During anti-TNF therapy [SES-CD]         | -              | 2.00 ± 1.69   | 8.90 ± 4.04   | 0.0004 / -                                 |
| Non-response (primary / secondary) [%]   | -              | -             | 60.00 / 40.00 | -                                          |

**Figure 7d patient information**

| ID  | Age | Gender | Disease | Montreal classification | Age at diagnosis | Disease duration [years] | Concomitant medical treatment |     |     |     |      |     | Anti-TNF Ab. | Prior anti-TNF [SES-CD] | During anti-TNF [SES-CD] | Anti-TNF      | Non-response |
|-----|-----|--------|---------|-------------------------|------------------|--------------------------|-------------------------------|-----|-----|-----|------|-----|--------------|-------------------------|--------------------------|---------------|--------------|
|     |     |        |         |                         |                  |                          | 5-ASA                         | BUD | GCS | MTX | 6-MP | AZA |              |                         |                          |               |              |
| 165 | 24  | m      | CD      | A1L2B1                  | 15               | 10                       |                               |     |     |     |      |     | Adalimumab   | 5                       | 4                        | responder     | -            |
| 8   | 76  | m      | CD      | A3L3B2p                 | 52               | 24                       |                               |     |     |     |      | X   | Adalimumab   | 8                       | 0                        | responder     | -            |
| 3   | 41  | f      | CD      | A2L2+L4B1               | 35               | 7                        |                               |     | X   |     |      | X   | Adalimumab   | 11                      | 4                        | responder     | -            |
| 4   | 31  | f      | CD      | A2L2LB1                 | 22               | 10                       |                               |     |     |     |      | X   | Adalimumab   | 10                      | 2                        | responder     | -            |
| 5   | 26  | m      | CD      | A1L3B1                  | 15               | 11                       | X                             |     | X   |     |      |     | Adalimumab   | 8                       | 0                        | responder     | -            |
| 9   | 54  | f      | CD      | A3L3B1                  | 44               | 11                       |                               |     |     | X   |      | X   | Adalimumab   | 6                       | 7                        | non-responder | secondary    |
| 10  | 33  | f      | CD      | A1L3+L4B1               | 15               | 19                       |                               |     |     |     |      |     | Adalimumab   | 8                       | 6                        | non-responder | primary      |
| 11  | 25  | m      | CD      | A1L1+L4B1               | 16               | 9                        |                               |     |     |     |      | X   | Adalimumab   | 5                       | 10                       | non-responder | primary      |
| 16  | 22  | m      | CD      | A2L2B3p                 | 19               | 3                        |                               |     | X   |     |      |     | Adalimumab   | 8                       | 11                       | non-responder | secondary    |
| 15  | 46  | m      | CD      | A2L3B1                  | 37               | 9                        |                               | X   |     |     |      | X   | Adalimumab   | 12                      | 20                       | non-responder | secondary    |
| 16  | 22  | m      | CD      | A2L3B2p                 | 19               | 3                        |                               |     | X   |     |      |     | Adalimumab   | 8                       | 11                       | non-responder | secondary    |
| 17  | 43  | m      | CD      | A2L1B2                  | 30               | 13                       |                               | X   |     |     |      | X   | Adalimumab   | 7                       | 9                        | non-responder | primary      |

**Figure 8abc patient information**

| ID  | Age | Gender | Disease | Age at diagnosis | Disease duration [years] | Anti-TNF Ab. | Anti-TNF treatment [months] |
|-----|-----|--------|---------|------------------|--------------------------|--------------|-----------------------------|
| 57  | 44  | m      | CD      | 27               | 17                       | Infliximab   | 7                           |
| 52  | 50  | f      | CD      | 44               | 7                        | Infliximab   | 11                          |
| 58  | 46  | f      | CD      | 21               | 25                       | Adalimumab   | 14                          |
| 59  | 53  | f      | CD      | 21               | 33                       | Adalimumab   | 28                          |
| 60  | 25  | f      | CD      | 22               | 4                        | Infliximab   | 6                           |
| 61  | 57  | f      | CD      | 45               | 12                       | Infliximab   | 18                          |
| 167 | 35  | f      | CD      | 26               | 9                        | Infliximab   | 13                          |
| 44  | 58  | f      | CD      | 56               | 2                        | Adalimumab   | 9                           |
| 84  | 30  | f      | CD      | 23               | 7                        | Adalimumab   | 4                           |
| 168 | 53  | m      | CD      | 53               | 3                        | Adalimumab   | 29                          |
| 169 | 24  | f      | CD      | 22               | 2                        | Adalimumab   | 20                          |
| 170 | 29  | f      | CD      | 18               | 11                       | Adalimumab   | 10                          |
| 171 | 74  | f      | CD      | 33               | 41                       | Infliximab   | 50                          |
| 172 | 43  | f      | CD      | 26               | 18                       | Infliximab   | 39                          |
| 173 | 21  | f      | CD      | 18               | 3                        | Infliximab   | 10                          |
| 144 | 23  | m      | CD      | 15               | 9                        | Adalimumab   | 24                          |
| 174 | 32  | m      | CD      | 24               | 8                        | Infliximab   | 11                          |
| 145 | 60  | f      | CD      | 27               | 34                       | Infliximab   | 18                          |
| 175 | 45  | f      | CD      | 38               | 7                        | Adalimumab   | 10                          |
| 176 | 71  | m      | CD      | 65               | 6                        | Infliximab   | 13                          |
| 177 | 19  | m      | CD      | 16               | 4                        | Infliximab   | 8                           |
| 178 | 54  | m      | CD      | 31               | 23                       | Infliximab   | 59                          |
| 90  | 37  | m      | CD      | 22               | 15                       | Adalimumab   | 72                          |
| 66  | 27  | f      | CD      | 19               | 9                        | Infliximab   | 10                          |
| 179 | 82  | f      | CD      | 82               | 3                        | Infliximab   | 26                          |
| 161 | 62  | m      | CD      | 61               | 2                        | Infliximab   | 3                           |
| 180 | 22  | f      | CD      | 19               | 3                        | Infliximab   | 15                          |
| 181 | 65  | m      | CD      | 61               | 5                        | Infliximab   | 27                          |
| 182 | 26  | f      | CD      | 22               | 4                        | Infliximab   | 17                          |
| 55  | 41  | m      | CD      | 23               | 19                       | Infliximab   | 31                          |
| 134 | 24  | m      | CD      | 19               | 6                        | Infliximab   | 64                          |
| 164 | 20  | m      | CD      | 13               | 7                        | Infliximab   | 6                           |
| 149 | 53  | m      | CD      | 28               | 25                       | Infliximab   | 15                          |
| 183 | 56  | f      | CD      | 28               | 29                       | Infliximab   | 20                          |
| 125 | 22  | m      | CD      | 19               | 4                        | Infliximab   | 4                           |
| 184 | 25  | m      | CD      | 23               | 3                        | Infliximab   | 8                           |

**Figure 8d patient information**

| ID  | Age | Gender | Disease | Montreal classification | Age at diagnosis | Disease duration [years] | Concomitant medical treatment |     |     |     |      |     | Anti-TNF Ab. | Anti-TNF treatment [months] | During anti-TNF [SES-CD] | Anti-TNF      | Non-response |
|-----|-----|--------|---------|-------------------------|------------------|--------------------------|-------------------------------|-----|-----|-----|------|-----|--------------|-----------------------------|--------------------------|---------------|--------------|
|     |     |        |         |                         |                  |                          | 5-ASA                         | BUD | GCS | MTX | 6-MP | AZA |              |                             |                          |               |              |
| 185 | 27  | f      | CD      | A2L1B2                  | 19               | 9                        |                               |     |     |     |      |     | Infliximab   | 58                          | 3                        | responder     | -            |
| 64  | 49  | f      | CD      | A1L3B2                  | 16               | 34                       |                               | X   |     |     |      |     | Infliximab   | 13                          | 4                        | responder     | -            |
| 186 | 36  | f      | CD      | A2L3B2p                 | 27               | 10                       |                               |     |     |     |      |     | Adalimumab   | 20                          | 0                        | responder     | -            |
| 9   | 59  | f      | CD      | A3L3B1                  | 44               | 16                       |                               |     |     |     |      |     | Adalimumab   | 5                           | 4                        | responder     | -            |
| 37  | 48  | f      | CD      | A3L2B1                  | 48               | 1                        |                               |     | X   |     |      |     | Infliximab   | 3                           | 0                        | responder     | -            |
| 67  | 23  | m      | CD      | A2L3B3p                 | 20               | 3                        |                               |     |     |     | X    |     | Infliximab   | 14                          | 3                        | responder     | -            |
| 187 | 36  | f      | CD      | A3L3B2                  | 55               | 3                        |                               |     |     | X   |      |     | Adalimumab   | 21                          | 4                        | responder     | -            |
| 68  | 33  | f      | CD      | A2L3B1                  | 21               | 13                       | X                             |     |     |     |      |     | Adalimumab   | 9                           | 17                       | non-responder | secondary    |
| 188 | 39  | f      | CD      | A2L1B2p                 | 33               | 7                        |                               |     |     |     |      |     | Infliximab   | 3                           | 11                       | non-responder | primary      |
| 189 | 22  | m      | CD      | A2L1B1                  | 19               | 4                        |                               |     | X   |     |      |     | Adalimumab   | 4                           | 17                       | non-responder | primary      |
| 190 | 24  | f      | CD      | A2L3+L4B1               | 17               | 7                        |                               |     |     |     | X    |     | Infliximab   | 7                           | 9                        | non-responder | primary      |
| 191 | 46  | f      | CD      | A2L3B2p                 | 19               | 28                       |                               |     |     |     |      |     | Infliximab   | 5                           | 23                       | non-responder | primary      |
| 95  | 19  | m      | CD      | A2L1+L4B1               | 17               | 2                        |                               |     | X   |     |      |     | Adalimumab   | 6                           | 17                       | non-responder | secondary    |
| 57  | 44  | m      | CD      | A2L3B2                  | 27               | 17                       | X                             |     |     |     |      |     | Adalimumab   | 13                          | 11                       | non-responder | primary      |
| 192 | 38  | f      | CD      | A2L1B2                  | 20               | 19                       |                               |     |     |     | X    |     | Infliximab   | 11                          | 6                        | non-responder | primary      |
| 70  | 37  | f      | CD      | A1L2B2p                 | 16               | 22                       |                               | X   |     |     |      |     | Adalimumab   | 14                          | 21                       | non-responder | secondary    |
| 74  | 30  | m      | CD      | A1L2B2                  | 16               | 15                       |                               |     |     |     |      |     | Adalimumab   | 39                          | 12                       | non-responder | secondary    |
| 76  | 37  | m      | CD      | A2L3B2                  | 23               | 14                       |                               |     |     |     |      |     | Infliximab   | 15                          | 7                        | non-responder | secondary    |
| 193 | 36  | f      | CD      | A2L1+L4B2               | 34               | 2                        |                               |     |     |     |      |     | Adalimumab   | 13                          | 15                       | non-responder | secondary    |
| 78  | 49  | f      | CD      | A2L3B2                  | 37               | 12                       | X                             |     |     |     |      |     | Adalimumab   | 15                          | 11                       | non-responder | secondary    |
| 194 | 32  | f      | CD      | A2L3B3p                 | 18               | 15                       |                               |     |     |     | X    |     | Adalimumab   | 4                           | 8                        | non-responder | primary      |

**Figure 8d statistics**

| Statistics                               | R             | NR            | p-value (R vs. NR) |
|------------------------------------------|---------------|---------------|--------------------|
| Age [years]                              | 39.71 ± 12.88 | 34.92 ± 9.16  | 0.30               |
| Gender (f/m) [%]                         | 85.71 / 14.28 | 64.28 / 35.71 | -                  |
| Age at diagnosis                         | 32.71 ± 15.91 | 22.64 ± 7.18  | 0.05               |
| Disease Duration [years]                 | 10.86 ± 11.45 | 12.64 ± 7.65  | 0.67               |
| 5-ASA [%]                                | 0.00          | 21.42         | -                  |
| BUD [%]                                  | 14.28         | 7.14          | -                  |
| GCS [%]                                  | 14.28         | 14.28         | -                  |
| MTX [%]                                  | 14.28         | 0.00          | -                  |
| 6-MP [%]                                 | 0.00          | 0.00          | -                  |
| AZA [%]                                  | 14.28         | 21.42         | -                  |
| Anti-TNF Ab. (Infliximab/Adalimumab) [%] | 57.14 / 42.85 | 35.71 / 64.28 | -                  |
| Duration anti-TNF treatment [month]      | 19.14 ± 18.43 | 11.29 ± 9.09  | 0.20               |
| During anti-TNF therapy [SES-CD]         | 2.57 ± 1.81   | 13.21 ± 5.22  | < 0.0001           |
| Non-response (primary / secondary) [%]   | -             | 50.00 / 50.00 | -                  |

**Supplementary figure 2 patient information**

| ID  | Age | Gender | Disease | Age at diagnosis | Disease duration [years] | Anti-TNF Ab. | Anti-TNF treatment [months] |
|-----|-----|--------|---------|------------------|--------------------------|--------------|-----------------------------|
| 181 | 65  | m      | CD      | 61               | 5                        | Infliximab   | 27                          |
| 195 | 64  | f      | CD      | 54               | 11                       | Infliximab   | 17                          |
| 32  | 43  | f      | CD      | 28               | 16                       | Infliximab   | 6                           |
| 196 | 54  | m      | CD      | 33               | 22                       | Infliximab   | 7                           |
| 147 | 22  | f      | CD      | 18               | 5                        | Infliximab   | 6                           |
| 197 | 36  | f      | CD      | 31               | 6                        | Infliximab   | 35                          |
