# Supplementary figures and images for: Expansion of IL-23 receptor bearing TNFR2+ T cells is associated with molecular resistance to anti-TNF therapy in Crohn’s disease
Source: PubMed Central journal article supplement — Gut. 2018 May 30;68(5):814–28. doi: 10.1136/gutjnl-2017-315671 (PMC6580782; doi:10.1136/gutjnl-2017-315671), 2018-05-30

Supplementary figure 2

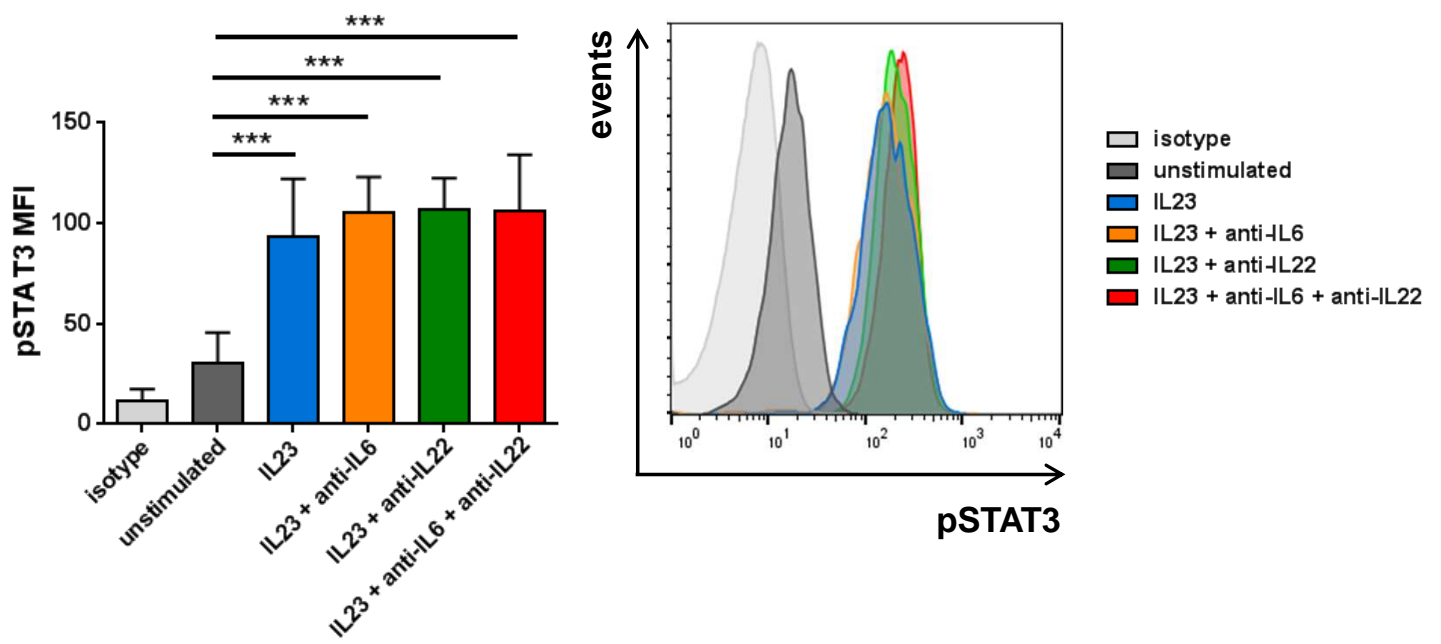

Supplement: gutjnl-2017-315671supp002.pdf [file gutjnl-2017-315671supp002.pdf]

Supplementary figure 3a

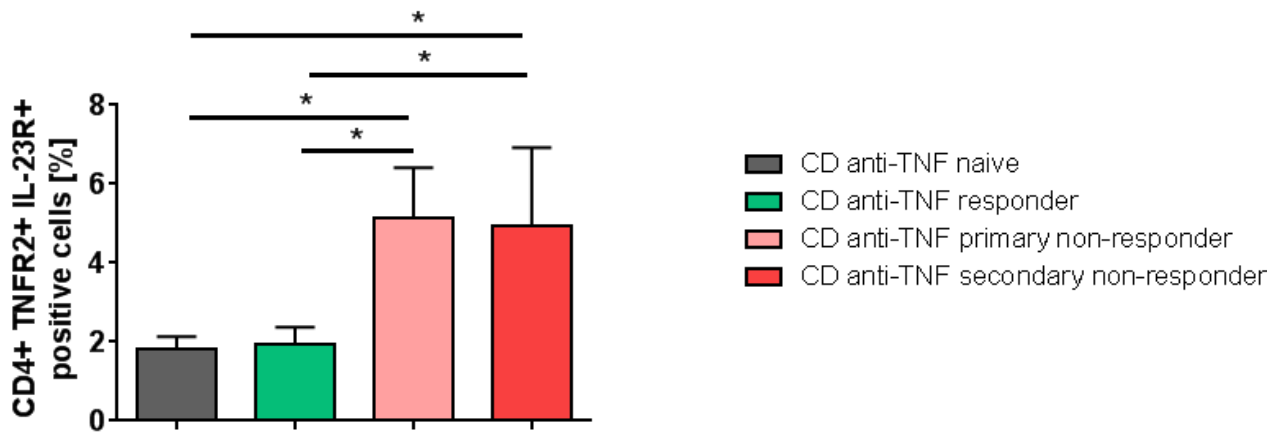

Supplementary figure 3b

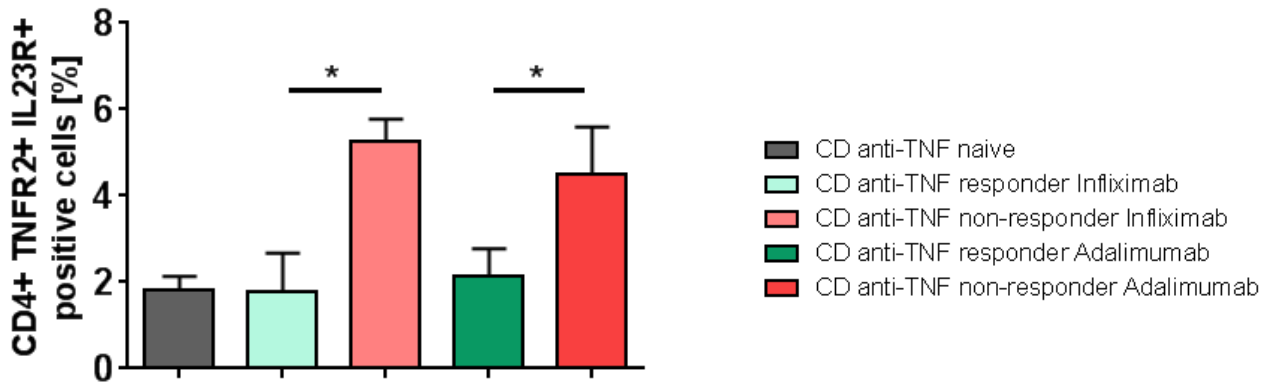

Supplement: gutjnl-2017-315671supp003.pdf [file gutjnl-2017-315671supp003.pdf]
